# Causal approach to environmental risks of seabed mining

Laura Kaikkonen<sup>1,2\*</sup>, Inari Helle<sup>2,3</sup>, Kirsi Kostamo<sup>4</sup>, Sakari Kuikka<sup>1</sup>, Anna Törnroos<sup>5</sup>, Henrik Nygård<sup>4</sup>, Riikka Venesjärvi<sup>3</sup>, Laura Uusitalo<sup>4</sup>

<sup>1</sup> Ecosystems and Environment Research Programme, Faculty of Biological and Environmental Sciences, University of Helsinki, Helsinki, Finland

<sup>2</sup> Helsinki Institute of Sustainability Science (HELSUS), University of Helsinki, Helsinki, Finland

<sup>3</sup> Natural Resources Institute Finland (Luke), Helsinki, Finland

<sup>4</sup> Finnish Environment Institute, Latokartanonkaari 11, FI-00790 Helsinki, Finland

<sup>5</sup> Åbo Akademi University, Environmental and Marine Biology, The Sea, Turku, Finland

\*Corresponding author: Laura Kaikkonen, Ecosystems and Environment Research Programme, Faculty of Biological and Environmental Sciences, University of Helsinki, email: [laura.kaikkonen@iki.fi](mailto:laura.kaikkonen@iki.fi)

21 **ABSTRACT**

22 Seabed mining is approaching the commercial mining phase across the world's oceans.  
23 This rapid industrialization of seabed resource use is introducing new pressures to marine  
24 environments. The environmental impacts of such pressures should be carefully evaluated  
25 prior to permitting new activities, yet observational data is mostly missing. Here, we  
26 examine the environmental risks of seabed mining using a causal, probabilistic network  
27 approach. Drawing on a series of interviews with a multidisciplinary group of experts, we  
28 outline the cause-effect pathways related to seabed mining activities to inform quantitative  
29 risk assessments. The approach consists of (1) iterative model building with experts to  
30 identify the causal connections between seabed mining activities and the affected  
31 ecosystem components, and (2) quantitative probabilistic modelling to provide estimates of  
32 mortality of benthic fauna in the Baltic Sea. The model is used to evaluate alternative  
33 mining scenarios, offering a quantitative means to highlight the uncertainties around the  
34 impacts of mining. We further outline requirements for operationalizing quantitative risk  
35 assessments, highlighting the importance of a cross-disciplinary approach to risk  
36 identification. The model can be used to support permitting processes by providing a more  
37 comprehensive description of the potential environmental impacts of seabed resource use,  
38 allowing iterative updating of the model as new information becomes available.

39 **Keywords:** Bayesian networks, causal maps, ecological risk assessment, expert  
40 elicitation, multiple pressures, probabilistic modelling, seabed mining

41

## 42 **1. INTRODUCTION**

43 The oceans are facing increasing pressures from human activities. The intensified use of  
44 marine space and resources is embodied both through expansion of existing activities  
45 (Halpern et al. 2015), and creating new industries for marine resource use (Voyer et al.  
46 2018; Winther et al. 2020). To ensure sustainable development of maritime activities, the  
47 impacts of new types of activities should be carefully evaluated prior to permitting them  
48 (Borja et al. 2016). Seabed mining is one of the rapidly emerging sectors promoted to  
49 support resource sufficiency, with especially the deep seabed presented as a new frontier  
50 for resource extraction (Hein et al. 2013). However, dealing with impacts of activities that  
51 do not take place yet means that there is no observational data on the impacts, with high  
52 uncertainties on both the implementation of the activity and its consequences for the  
53 environment. This uncertainty creates a challenge to estimate the impacts in a way that is  
54 scientifically robust, while accounting for the knowledge gaps and scarcity of data to  
55 support decision-making.

56 Current plans for mining are outlined both in shallow continental shelf areas and the deep  
57 sea, encompassing areas within national jurisdiction of sovereign states and the  
58 international seabed in the 'Area' (Miller et al. 2018). While most initiatives are still at an  
59 exploratory stage, the increasing need for raw materials is pushing countries to consider  
60 where to get their mineral resources in the future (Vidal et al. 2017).

61 Seabed mining will likely affect all levels of marine ecosystems, including the water column  
62 and the seafloor (Boschen et al. 2013; Kaikkonen et al. 2018; Miller et al. 2018). The  
63 potential environmental impacts of mining have been addressed in an increasing number  
64 of studies (Miljutin et al. 2011; Jones et al. 2017; Orcutt et al. 2018; Simon-Lledó et al.  
65 2019). Even with valuable data from these experiments, the impact studies conducted to

66 date offer a scattered view of the environmental impacts, with no attempts to synthesize  
67 impacts to support an operational assessment. It is further uncertain to what extent the  
68 empirical disturbance studies succeed in scaling up to industrial mining operations (Jones  
69 et al. 2017).

70 Environmental risk assessment (ERA) is a process aiming to evaluate the different  
71 possible outcomes following human activities (Burgman 2005). A risk in this context is  
72 defined as any unwanted event (here 'impact') and its probability. Currently, most ERAs  
73 build on estimating ecosystem responses to pressures based on vulnerability of the  
74 environment through semi-quantitative scoring instead of the activity itself (Stelzenmueller  
75 et al. 2015; Washburn et al. 2019; Quemmerais-Amice et al. 2020), and as such are not  
76 well suited for describing different possible combinations of outcomes from new untested  
77 activities. By assuming additive relationships of pressures, these approaches often neglect  
78 the synergistic and antagonistic effects of pressures (Halpern and Fujita 2013).

79 A broader appreciation of the risks in the context of new maritime activities thus calls for  
80 improved systems thinking, structured approaches, and integration of knowledge from  
81 multiple sources and disciplines (Holsman et al. 2017). Updating of prior knowledge is  
82 important to evaluate to what extent new studies could decrease the uncertainties. A first  
83 step towards a comprehensive view of the risks stemming from seabed mining activities  
84 requires identifying the sources of changes in the environment, affected ecosystems  
85 components, and any further variables associated with these.

86 Drawing on the recognition of causes and effects, causal chains or networks offer a  
87 systematic method to study environmental impacts (Perdicoúlis and Glasson 2006). By  
88 describing the factors affecting the state of the system in as much detail as possible,  
89 causal networks enable evaluating multiple scenarios and improve understanding of the  
90 underlying mechanisms in the studied system (Pearl 2009). When applied in

91 environmental management, causal approaches have been shown to be useful in policy  
92 interventions and management (Carriger et al. 2016; Carriger et al. 2018).

93 Bayesian networks (BNs) are graphical models that represent a joint probability distribution  
94 over a set of variables and provide an alternative to commonly used scoring procedures in  
95 ERAs (Pearl 1986; Kaikkonen et al. 2021). In BNs, the strength of each connection  
96 between variables is described through conditional probabilities. As probabilistic models,  
97 the result of a BN is not a single point estimate, but a probability distribution over the  
98 possible values of each variable, allowing estimating not only the most likely outcome, but  
99 also the uncertainty associated with the estimates (Varis et al. 1990; Fenton and Neil  
100 2012). BNs can thus be used to synthesize outcomes of multiple scenarios by evaluating  
101 possible combinations of events and weighting them according to how likely they are.  
102 Given their modular structure, they can be used to support integrative modelling and can  
103 accommodate inputs from multiple sources, including simulations, empirical data, and  
104 expert knowledge (Uusitalo 2007; Helle et al. 2020).

105 Here, we describe an approach for integrating expert knowledge into a causal risk  
106 assessment for seabed mining. We use the Baltic Sea as an example to test our  
107 approach, as mining iron-manganese nodules has already been tested in an industrial  
108 setting in this area (Zhamoida et al. 2017) and the ecosystem components and food web  
109 structure are well studied (Yletyinen et al. 2016; Reusch et al. 2018; Törnroos et al. 2019).  
110 Given the number of ongoing seabed mining initiatives and attempts to quantify impacts,  
111 the aim of this work is to provide a framework that allows combining information from  
112 multiple sources by bringing ecological information to risk analysis while explicitly  
113 addressing uncertainty. To move towards a quantitative risk assessment, we demonstrate  
114 the use of BNs in an operational setting and discuss needs for a quantitative ERA in the  
115 context of emerging maritime activities.

## 116 **2. CASE STUDY BACKGROUND**

117 Our case study deals with ferromanganese (FeMn) concretion removal in the northern  
118 Baltic Sea. The Baltic Sea is characterized by low species richness compared to many  
119 marine areas, and the food web structure and ecological traits characterizing major taxa  
120 have been well described (Törnroos and Bonsdorff 2012). Due to the relatively shallow  
121 depth of the Baltic Sea, the extraction activity is to some extent comparable to sand and  
122 gravel extraction and would likely be performed by suction hopper dredging (Zhamoida et  
123 al. 2017).

124 In our study scenario, mineral extraction is restricted to areas with a minimum depth of 40  
125 meters, assuming regulatory limits of such activities below the aphotic zone (Kostamo  
126 2021). The densest occurrences of FeMn concretions in Baltic Sea are also found below  
127 these depths (Kaikkonen et al. 2019). We assume that extraction is performed in a zig-zag  
128 pattern in a limited extraction area of 1 km<sup>2</sup> and it removes all concretions in the path of the  
129 suction head (Fig. 1). Here we assume homogeneous impacts on the areas that are not  
130 subject to direct extraction, although in reality the spatial footprint of impacts is dependent  
131 on the particle movement and distance of a point from the extraction area (Smith and  
132 Friedrichs 2011; Spearman 2015). Risks related to operating the vessels and impacts  
133 during transportation are not considered, as they are well addressed in other studies  
134 (Kulkarni et al. 2020).

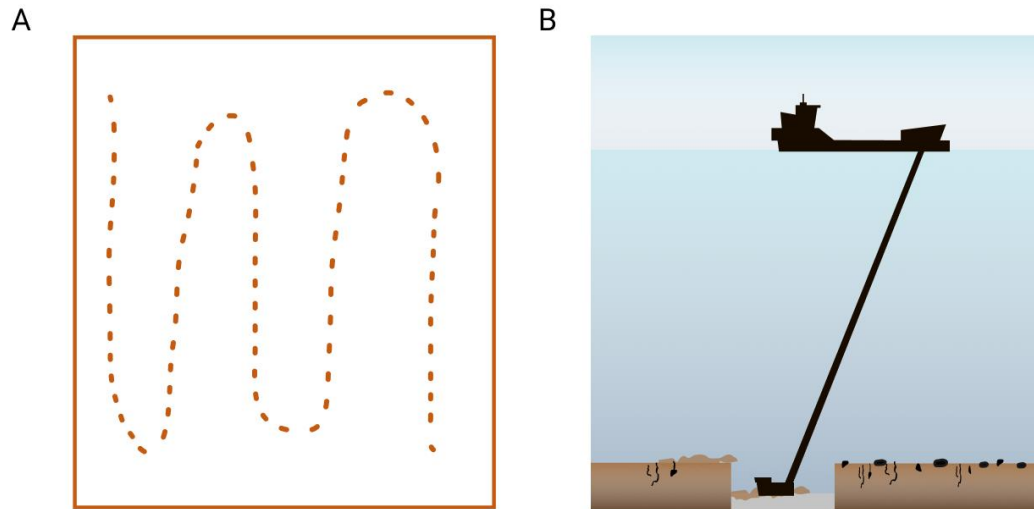

135

136 **Figure 1.** A) Plan view and B) profile view of mining a 1 km<sup>2</sup> mining block. The dotted  
137 lines in panel A illustrate the extraction pattern of the mining device in a discrete block with  
138 FeMn concretions.

### 139 3. METHODS

140 We apply a 3-step approach for working together with experts to create a model that  
141 summarizes the causal connections in the system and enables providing quantitative risk  
142 and uncertainty estimates (Fig. 2). The first step consists of mapping the relationships  
143 between key drivers and ecosystem responses with experts in semi-structured interviews.  
144 The use of structured methods for expert elicitation has been highlighted in recent years,  
145 and here we follow a modified version of the IDEA (Investigate-Discuss-Estimate-  
146 Aggregate) protocol that consists of both individual and aggregated assessments from  
147 experts (Burgman 2016; Hemming et al. 2018). Although the method is designed for  
148 quantitative estimates, here we use it only for qualitative causal mapping to test a  
149 structured approach for more comprehensive interviews. In the second step, a combined  
150 model structure is created and reviewed by the experts in an iterative manner until a

151 satisfactory model structure was obtained. The final step consists of quantifying the  
152 magnitude of the ecosystem impacts through conditional probabilities.

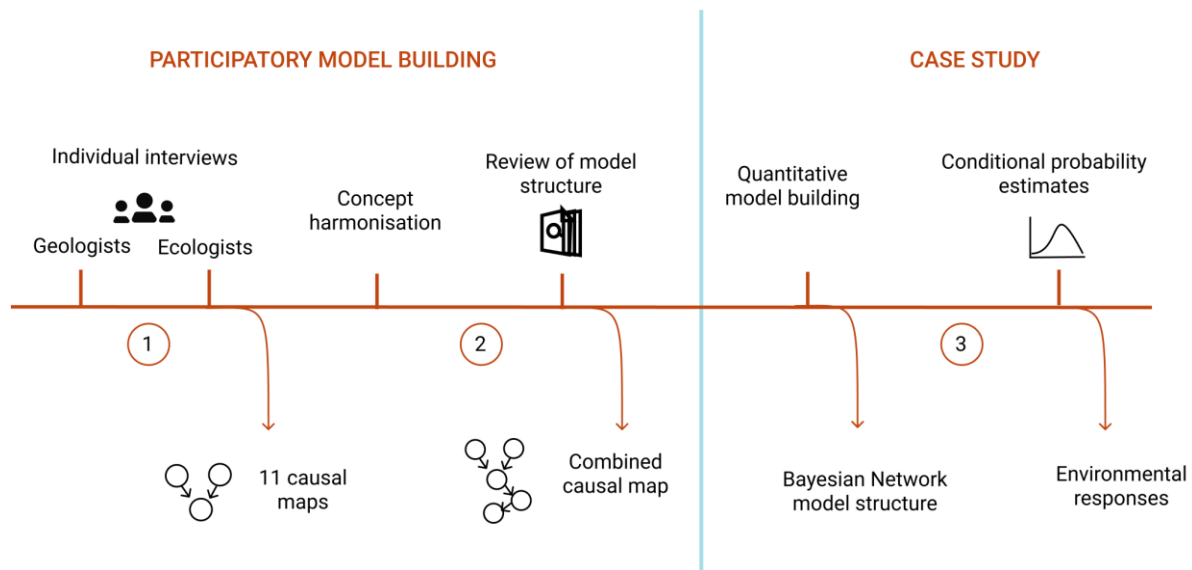

153

154 **Figure 2.** Conceptual figure of the modelling process summarizing the activities within the  
155 proposed approach (upper panel) and four main outcomes (lower panel).

### 156 3.1 Step 1: Expert interviews

157 Framing the system and the connections between variables was performed as a causal  
158 mapping exercise with a multidisciplinary group of experts. The aim of causal mapping is  
159 to explore an individual's view on a system under different scenarios by detailing the  
160 causes and effects. In an ERA context, this step constitutes the risk identification stage  
161 (Suter II 2016). Experts were recruited through snowball sampling by consulting  
162 researchers in different fields of marine sciences. To attain a diverse sample and sources  
163 of knowledge, we sent invitations to experts representing varying backgrounds in different  
164 institutes. The final list of experts participating in the study included 11 experts from  
165 universities in Finland and Sweden, governmental research institutes, as well as  
166 intergovernmental organizations working on the Baltic Sea (ICES, HELCOM).



167 The causal mapping exercise was conducted through semi-structured interviews. We used  
168 individual interviews, as group interviews can be dominated by a small number of  
169 individuals (Martin et al. 2012), and experts' judgments can be influenced by their peers  
170 (O'Hagan et al. 2006). Gradual elicitation allowed us to evaluate when a sufficient number  
171 of experts had been interviewed by monitoring when the number of variables no longer  
172 increased with the addition of new experts.

173 Semi-structured interviews were held at a location chosen by the interviewee or via an  
174 online connection. For face-to-face interviews, causal maps were drawn on paper,  
175 whereas in online interviews maps were constructed using an online drawing tool. All  
176 interviews were recorded with consent from the interviewee.

177 At the beginning of each interview, participants were introduced to the use of causal  
178 networks. Each expert was presented with the same scenario of the mining activity and the  
179 changes in the environment arising from the activity, noted as pressures (Table 1). Details  
180 on how mining would likely be carried out were drawn from literature and informal  
181 consultation with experts in geology and mineral resource extraction.

182 **Table 1.** Physicochemical changes in the environment (pressures) arising from mining  
183 used as a starting point in causal mapping with experts.

| <b>Pressure type</b>                    | <b>Description and references</b>                                                                                                                                                            |
|-----------------------------------------|----------------------------------------------------------------------------------------------------------------------------------------------------------------------------------------------|
| Nodule removal                          | FeMn concretion removal from a mining block.<br>Contributes to loss of hard substrate on otherwise soft seabed.                                                                              |
| Modification of seafloor substrate type | Measure of changes in the sediment environment, including changes in: <ul style="list-style-type: none"><li>· Grain size</li><li>· Sediment porosity</li><li>· Sediment compaction</li></ul> |

|                                               |                                                                                                                                                         |
|-----------------------------------------------|---------------------------------------------------------------------------------------------------------------------------------------------------------|
|                                               | <ul style="list-style-type: none"> <li>· Organic enrichment</li> <li>· Pore water composition</li> <li>· Oxygen penetration depth</li> </ul>            |
| Modification of seafloor topography           | Changes in seafloor topography following extraction activities (Zhamoida et al. 2017).                                                                  |
| Sediment dispersal in the water column        | Total suspended solids concentration near the surface or in the water column both from the processing return and mining tool operation (Spearman 2015). |
| Sediment dispersal near seafloor              | Total suspended solids concentration near the seafloor resulting from the processing return and mining tool operation (Sharma et al. 2001).             |
| Release of nutrients from the sediment        | Release of soluble nutrients from the sediment plume to the seabed water column (Jones and Lee 1981; Lohrer and Wetz 2003).                             |
| Release of toxic substances from the sediment | Release of contaminants from the sediment plume to the water column (Simpson and Spadaro 2016; Hauton et al. 2017; Couvidat et al. 2018).               |
| Underwater noise                              | Noise from the mining operation, including extraction of the substrate and vessel operations (Robinson et al. 2011; Theobald et al. 2011).              |

184

185 The first three interviews were held with marine geologists with experience in underwater  
 186 mining technology. These interviews were used to adjust the pressures identified in a  
 187 literature review and to identify environmental parameters and operational factors likely to  
 188 affect the magnitude of the physiochemical changes arising from mining (Table 1). These  
 189 variables form the core of the model by describing the basic processes related to mining.

190 To explore the ecological impacts arising from these pressures, the following eight  
191 interviews were conducted with marine ecologists. Each expert was presented with the  
192 same scenario of the mining activity and the physicochemical pressures identified in the  
193 first phase with the geologists (Table 1). The experts were then asked which ecosystem  
194 components they think will be affected by these pressures. Whenever possible, experts  
195 were asked to rate the strength of the causal connection on a 1–3 scale. As the number of  
196 individual species even in the relatively species-poor Baltic Sea is too high to include in  
197 one model, we reduced this complexity by asking experts to address the affected  
198 organisms through the functional traits that would differentiate the effects on these  
199 organisms.

200 Experts were given unlimited time to complete the causal map and were informed that they  
201 may modify the causal map after the interview. After each interview (approximately 2–3  
202 hours each), the causal maps were digitized, and the resulting maps were sent to the  
203 experts for verification.

### 204 **3.2 Step 2: Combining causal maps**

205 To obtain a comprehensive view of the environmental impacts of mining, the individual  
206 causal maps were combined into one causal network. To do this, we coded the  
207 connections between variables in the individual causal maps to adjacency matrices using  
208 the assigned link strengths whenever available. Prior to combining the maps, variables  
209 were harmonized and combined so that similar concepts were grouped under one  
210 variable. For instance, the terms “polychaetes”, “annelids”, and “worms” were grouped  
211 under ‘mobile infauna’ (see Table S1 in Supporting Information for full details of individual  
212 maps).

213 The final list of functional groups was compiled from the traits and taxa mentioned in the  
214 expert interviews and groupings used in other studies (Hewitt et al. 2018) based on the  
215 expected response of organisms to the pressures caused by mining so that the traits  
216 characterize differential responses in the organisms. Here, traits are treated as binary  
217 variables, although most species express a variety of traits (Villnäs et al. 2018).

218 While elicitation of individual causal maps has been explored in depth in literature (Özesmi  
219 and Özesmi 2004; LaMere et al. 2020), there is little guidance on how to systematically  
220 combine diverse variables into one consensus map. In this work, all non-redundant  
221 variables and connections were included in the combined network. To ensure that the  
222 combined map represented the views of the experts involved in the model framing, experts  
223 had the possibility to comment on the network structure in an open online document  
224 presented both in the form of a graph and a table. At this stage, the document and the  
225 comments were visible to all experts.

### 226 **3.3 Step 3: Bayesian Network model development**

227 The final causal network was used to develop a probabilistic Bayesian network (BN) to  
228 provide quantitative estimates of the ecological consequences of mining to ecosystem  
229 components under different mining scenarios. In this work, we quantified only a sub-model  
230 of the complete causal network focusing on three groups of benthic fauna: sessile filter  
231 feeding epifauna, mobile epifauna, and burrowing infauna. The BN model was developed  
232 from variables describing these three benthic faunal groups, the main pressures affecting  
233 them, and any intermediate variables between them in the combined causal network. To  
234 reduce complexity of the model in terms of spatial and temporal dimensions of the  
235 impacts, we restricted the model to account only for the acute impacts within a spatially  
236 discrete mining block as defined in the case study description (Fig. 1). Discrete variable  
237 states were drawn from literature and expert views. We use relative descriptions of

238 pressures with relation to ambient conditions (e.g. low-high). To evaluate the model  
239 structure, we conducted a point-by-point walkthrough of the model with external experts in  
240 marine ecology and geology who had not participated in the model building.

241 To quantify the magnitude of impacts between the pressures and the benthic faunal  
242 groups, we modelled the BN as an expert system, meaning that no empirical data is  
243 directly incorporated in the model. We used the graphical interface provided open source  
244 Application for Conditional probability Elicitation (ACE) (Hassall et al. 2019) to initialize the  
245 conditional probability tables (CPTs) with one expert in geology and one benthic ecologist.  
246 The application provides a starting point for defining the overall shape of a conditional  
247 probability distribution, which is done by ranking the direction and magnitude of the parent  
248 nodes on the child node and populating the table through a scoring algorithm (Hassall et  
249 al. 2019). The scoring system considers that all variable states can be placed on an  
250 equally spaced linear scale.

251 To assess probabilities of the impacts of direct pressures on benthic fauna, the CPTs  
252 initialized with the ACE application were evaluated and adjusted in a second session with  
253 another benthic ecologist. The total mortality of benthic fauna within a discrete block and  
254 one moment in time comprises the direct mortality from extraction of sediment and mineral  
255 concretions, and the indirect mortality of the remaining fauna that are exposed to the  
256 pressures from the extraction activity. The probability of total mortality of benthic fauna  
257 was thus calculated as:

$$258 \quad P(\text{Total mortality}) = P(DM) + P(IM) \times (1 - P(DM))$$

259 where the term  $IM \times (1 - DM)$  accounts of the proportion of fauna remaining after direct  
260 extraction. We applied numerical approximation at 1% accuracy to calculate joint

261 probabilities of the combined discrete classes (Table 2) for total mortality used in the  
262 model.

263 The resulting CPTs were incorporated in the BN model created in R software (R 2020).  
264 Using the Bayes rule, BNs enable evaluating different scenarios and to compute posterior  
265 probabilities given new knowledge. In this context, a BN allows modification of the  
266 operational parameters to evaluate the impacts of different mining operations and the  
267 associated changes in the functional groups. The joint probability distribution in the BN  
268 may then be used to make queries on the impact of multiple pressures on specific  
269 ecosystem components to assess the risks and to evaluate which variables should be  
270 monitored to obtain a reasonable overview of the impacts. Here we queried the network on  
271 two alternative mining scenarios, which we define as a combination of specific states of  
272 the decision variables that describe the overall mining process and are assumed to be  
273 controlled by the party responsible for the mining operation (Table 2). The random  
274 variables in the model are further affected by these decision nodes (Figure 4, Table 2).  
275 The modelling was done using R 3.6.3, with package *bnlearn* (Scutari 2009). Full details of  
276 the model with the R scripts and the conditional probability tables are available at:  
277 [https://github.com/lkaikkonen/Causal\\_SBM](https://github.com/lkaikkonen/Causal_SBM) .

## 278 **4. RESULTS**

### 279 **4.1 Causal maps**

280 The expert interviews resulted in 11 individual causal maps. In some cases, the experts  
281 took the lead in drawing the variables and connections between them, whereas in most  
282 interviews the modeler had the main responsibility of drafting the map based on the  
283 discussion.

284 The number of variables in the individual maps varied between 8 and 24. In general, there  
285 were no contradictory views, and the differences between the maps were attributed to the  
286 number of variables and level of detail in different processes regarding the impacts of  
287 mining. We were not successful in eliciting all link strengths, and only the strongest  
288 connections were explicitly given by all experts. The individual causal maps are included in  
289 the Supporting Information (S1).

290 After concept harmonization, the final causal map has 53 variables. Multiple iterations of  
291 expert comments on the causal network structure resulted in a combined causal network  
292 with 96 connections (Figure 3). The rationale for the connections between variables and  
293 further details on them are summarized in Tables S2–S4 in the Supporting Information.

#### 294 **4.2 Impacts of mining on marine ecosystems: Combined causal network**

295 The first set of interviews with geologists revealed several factors affecting the magnitude  
296 of physicochemical changes in the environment, related to both the execution of the  
297 mining operation and the prevailing environmental conditions (Table 2). The factors  
298 regarding the mining technique included water depth at the extraction site, depth of  
299 extracted sediment, and processing return technique. Both the geologists and ecologists  
300 included several environmental factors in their causal maps, including variables describing  
301 the sediment characteristics and composition, water column chemistry, and hydrological  
302 parameters (Figure 3).

303 The impacts on the biological ecosystem components were more complex and spanned  
304 into the spatial and temporal dimensions than the physicochemical changes in the  
305 environment. Experts successfully adopted a parsimonious attitude to defining the  
306 functional groups and expressed how these groups would be affected by the different  
307 pressures. The most detail in terms of functional traits was given to benthic fauna which

308 are most directly affected by substrate extraction. Experts included a wide range of  
309 organisms in the assessment that were unlikely directly affected in the extraction area,  
310 including early life-stages of fishes, macrophytes, and mammals. Factors affecting the  
311 recovery potential of organisms and ecosystem functions after disturbance were  
312 mentioned in all interviews.

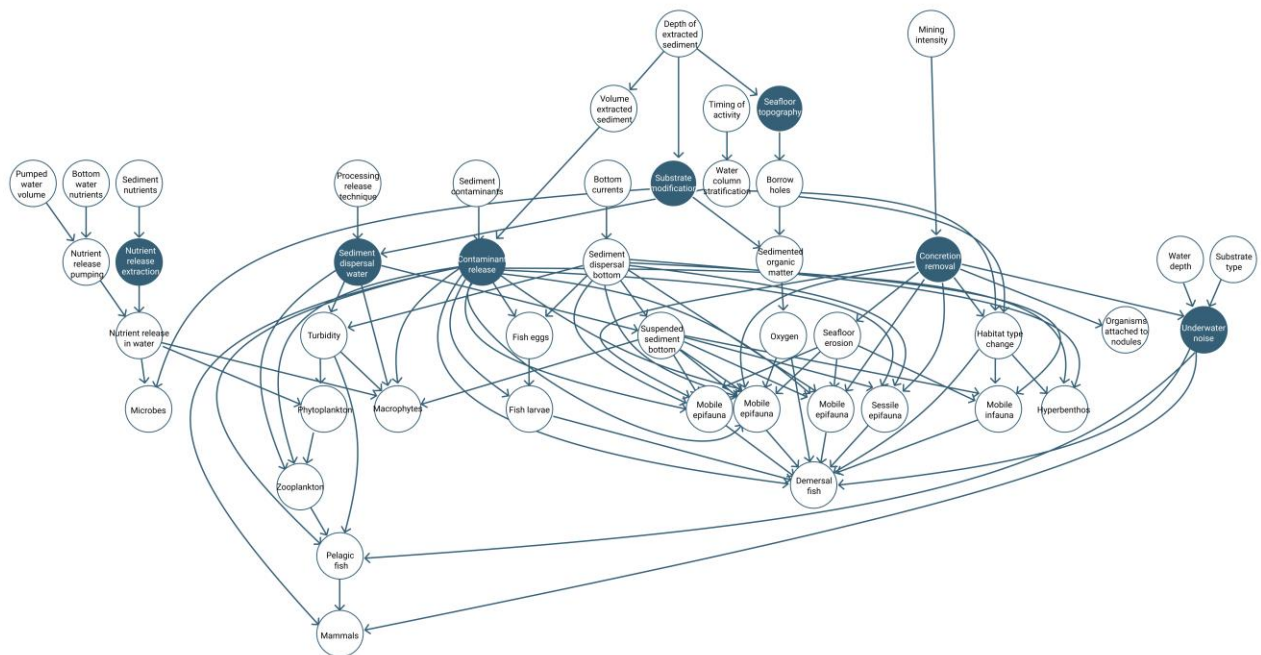

313

314 **Figure 3.** Combined causal map of the environmental and ecological effects of seabed  
315 nodule extraction on Baltic Sea ecosystem. The colored ovals denote pressures that were  
316 the starting point for each interview and the subsequent causal mapping. For full details of  
317 the variables and causal connections, see Tables S2-S4 in the Supporting Information.

318 Direct extraction of seabed substrate and the resulting habitat loss was deemed to have  
319 the most significant impact on benthic fauna. Many experts equally considered the impacts  
320 of elevated suspended sediment concentrations on filter feeding organisms severe. In the  
321 interviews, the functional groups were deemed different in terms of acute impacts of  
322 disturbance. For example, while highly mobile organisms like fish are assumed to escape



323 from the extraction area, significant changes in the environment either through  
324 modification of bottom substrate or benthic fauna as food are expected to potentially affect  
325 the distribution of demersal fish species. Similarly, release of contaminants from the  
326 sediment was estimated to significantly affect all organisms, yet it was noted that many  
327 toxic effects might only be expressed in the reproductive success of organisms. Nearly all  
328 experts noted the negative impacts of underwater noise on mammals and fishes.

#### 329 **4.3 Quantitative case study: Acute impacts on benthic fauna**

330 The full causal model is highly complex (Fig. 3), and parameter estimation would be a  
331 demanding task. Therefore, for illustration we selected 18 variables for the quantitative  
332 analysis to describe the acute impacts on benthic fauna (Figure 4, Table 2). We queried  
333 the network on two different mining scenarios. The resulting probability distributions are  
334 presented in figure 5.

335

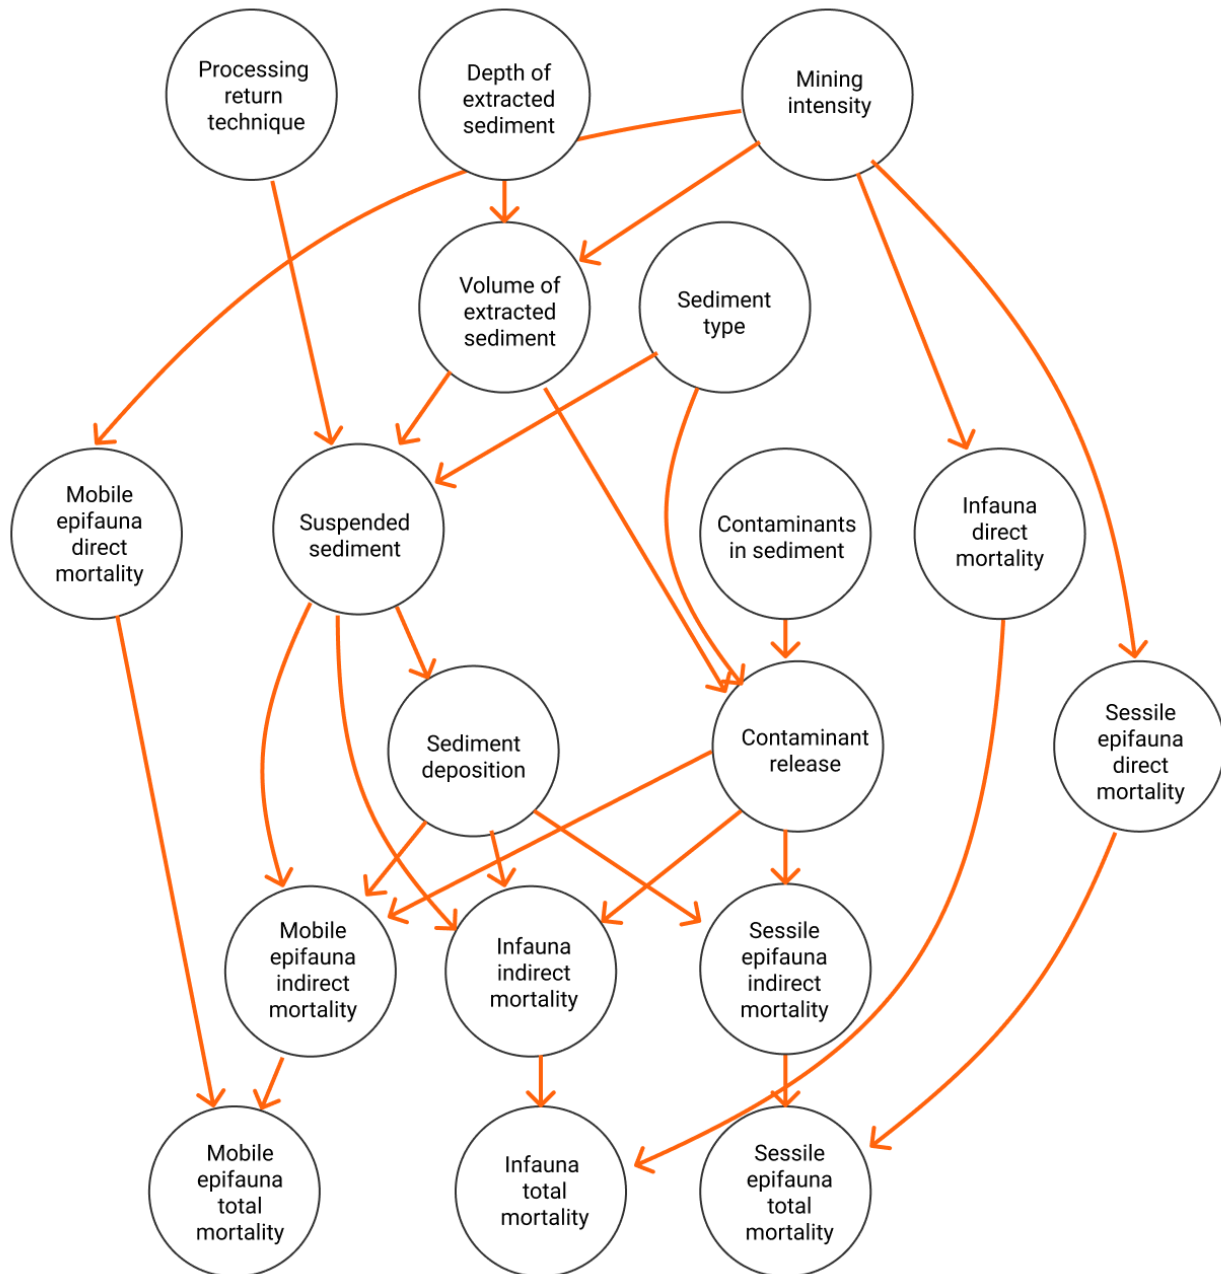

336

337 **Figure 4.** Bayesian network structure for immediate impacts on selected groups of benthic  
 338 fauna. Mining scenario may be controlled by *processing return technique*, *depth of*  
 339 *extracted sediment*, and *mining intensity*.

340 **Table 2.** Variables in the Bayesian Network model for ecological risks of seabed mining.

| Variable category | Variable name | Description | Variable type | Possible states |
|-------------------|---------------|-------------|---------------|-----------------|
|-------------------|---------------|-------------|---------------|-----------------|

|                                   |                             |                                                                |                   |                                |
|-----------------------------------|-----------------------------|----------------------------------------------------------------|-------------------|--------------------------------|
| <b>Environmental conditions</b>   | Sediment Type               | Underlying sediment type                                       | Random variable   | Soft-Hard-Rocks                |
|                                   | Contaminants in sediment    | Concentration of toxic substances in the sediment              | Random variable   | Low-Medium-High                |
| <b>Extraction technique</b>       | Depth of extracted sediment | Depth of extracted sediment                                    | Decision variable | <10cm / 11-30cm / >30cm        |
|                                   | Volume of extraction        | Volume of extracted sediment                                   | Random variable   | Low-Medium-High                |
|                                   | Processing return technique | Depth of the processing return of the excess sediment material | Decision variable | At the surface/ At the bottom  |
|                                   | Mining intensity            | Proportion of concretions removed from the mining area.        | Decision variable | 50%-75-100% removed            |
| <b>Environmental changes</b>      | Suspended sediment          | Suspended sediment near the seafloor                           | Random variable   | Low-Medium-High                |
|                                   | Contaminant release         | Release of toxic substances                                    | Random variable   | Low-Significant                |
|                                   | Sediment deposition         | Amount of sediment deposited on the seafloor                   | Random variable   | Low-Medium-High                |
| <b>Affected functional groups</b> | Sessile epifauna            | Relative mortality of sessile epifauna                         | Random variable   | 0-10/11-30/31-60/61-80/81-100% |
|                                   | Infauna                     | Relative mortality of mobile infauna                           | Random variable   | 0-10/11-30/31-60/61-80/81-100% |
|                                   | Mobile epifauna             | Relative mortality of mobile epifauna (fast-moving)            | Random variable   | 0-10/11-30/31-60/61-80/81-100% |

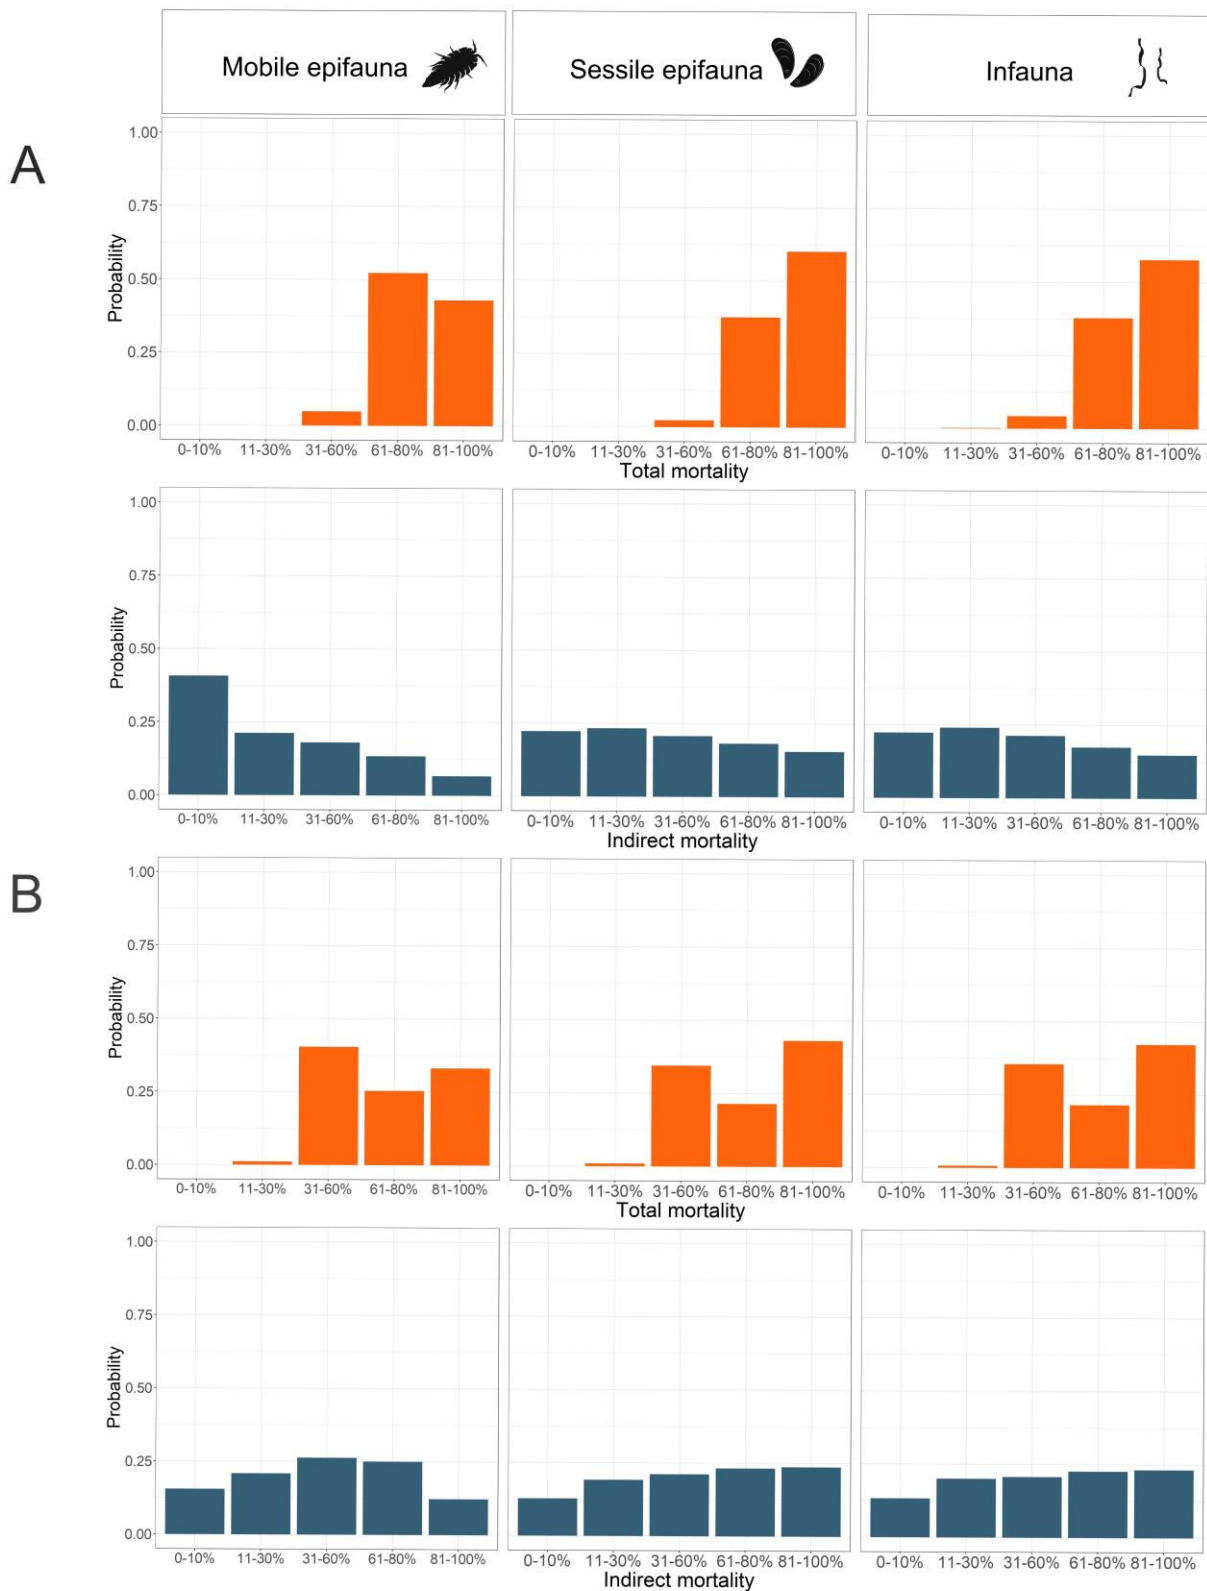

342

343 **Figure 5.** Joint probability distribution of the total and indirect mortality of mobile epifauna,  
344 sessile epifauna, and infauna under two alternative mining scenarios: A) Mining 75% of a

345 discrete mining block with 11-30cm sediment extracted, and B) mining 50% of a discrete  
346 mining block with 11-30cm sediment extracted with release of harmful substances from the  
347 sediment.

348 In the case of mining 75% of a discrete mining block, the most probable outcome in terms  
349 of total mortality for both sessile epifauna and infauna is estimated to be 81–100%  
350 mortality (Fig. 5, A). The probability of the highest mortality for sessile epifauna is slightly  
351 higher than for infauna (60.1% compared to 57.7%, respectively). For mobile epifauna,  
352 60–80% mortality is the most likely outcome with a 52.2% probability.

353 The likeliest outcome of the mining scenario described above in terms of indirect mortality  
354 resulted in indirect mortality of 11–30% of both infauna (24.1% probability) and sessile  
355 epifauna (23.3% probability) and 0-10% mortality of mobile epifauna with 40.7% probability  
356 (Fig. 5, A). The probability of the highest mortality (81–100%) is 14.8% for infauna, 15.5%  
357 for sessile epifauna and 6.6% for mobile epifauna. Overall, the probability of both indirect  
358 and direct mortality on sessile epifauna and infauna are deemed equally widely distributed.

359 The BN model allows estimating the probability of any variable of interest in the model  
360 (here relative mortality) given certain evidence (e.g. regarding the mining operation or  
361 environmental conditions). To give an example, when mining occurs on only 50% of a  
362 discrete block, but release of harmful substances is known to occur, the probabilities for  
363 the indirect mortality of benthic fauna are higher for all groups (Fig. 5, B). These changes  
364 illustrate the relative importance of certain pressures on the overall mortality.

365 Changes in the extent of direct extraction of seabed substrate and FeMn concretions had  
366 the largest impact on the direct mortality of the benthic fauna. In terms of indirect effects,  
367 the release of ecologically significant levels of toxic substances from the sediment had the  
368 highest impact on the mortality of benthic fauna. In a similar way, the model may be used

369 to evaluate the cumulative effects of multiple stressors for each assessed ecosystem  
370 component by first ranking the relative effects of each stressor on the mortality of the  
371 community and then evaluating the probability distribution for each combination of stressor  
372 levels.

## 373 **5. DISCUSSION**

374 This study presents the first systematic evaluation of the ecological risks associated with  
375 seabed mining. By interviewing a multidisciplinary group of experts, we outline a basis for  
376 an ecological risk assessment model. We further demonstrate how qualitative information  
377 may be used to move towards a quantitative assessment by using a causal probabilistic  
378 approach to estimate the impacts of seabed disturbance and direct sediment extraction on  
379 benthic fauna in the Baltic Sea. These results show that the knowledge related to the  
380 impacts of seabed mining is still low, calling for further research on the risks of mining if  
381 the operation permits are to be based on a valid scientific understanding.

382 Involving multiple experts in consecutive interviews provided a comprehensive view of the  
383 pressures arising from mining, factors affecting the magnitude of the physicochemical  
384 changes, and the affected ecosystem components. Particularly the interviews with  
385 geologists enabled the inclusion of operational variables related to mining activity and  
386 environmental conditions that were deemed to govern the magnitude of pressures. Most  
387 detail in terms of affected biological components was given to benthic faunal groups from  
388 all ecologists. While we had expected experts to prioritize their own fields' species in more  
389 detail, this was not always the case, and the experts' previous participation in similar  
390 mapping exercises seemed to be the factor governing the number of connections and  
391 variables.

392 Although many of the impact pathways described in the obtained causal maps have been  
393 cited in previous studies (Koschinsky et al. 2018; Christiansen et al. 2020), our mapping  
394 exercise enabled a more detailed inclusion of pelagic ecosystem components which have  
395 been neglected in many previous studies on seabed impacts (Newell et al. 2004; Boyd et  
396 al. 2005; Krause et al. 2010; Christiansen et al. 2020). A qualitative causal representation  
397 of the impacts alone can thus help better understand how risks emerge and can potentially  
398 be mitigated (Chen and Pollino 2012; Carriger et al. 2018). Drafting the causal maps from  
399 the beginning further ensures that all relevant connections are included, and biases in  
400 thinking will be revealed easier (Tversky and Kahneman 1979; Renn 2008).

401 Depending on the extraction intensity and the functional group, acute mortality of benthic  
402 fauna was estimated to be most likely at rates of 60–100% in the directly affected area and  
403 0–10% to 10–30% in the indirectly affected area. The probabilities of very high indirect  
404 mortality (81–100%) were over 10% in both of the evaluated scenarios for sessile epifauna  
405 and infauna. Accounting for the indirect mortality separately allows further refining the  
406 assessment to account for the impacts of indirect effects, as these are deemed significant  
407 in terms of the spatial footprint due to dispersal of suspended sediment (Boyd and Rees  
408 2003; Desprez et al. 2009).

409 Overall, the probability distributions on the relative mortality of benthic fauna from expert  
410 assessment are rather broad, showing low levels of certainty on the impacts. One reason  
411 for this is likely the lack of scientific knowledge, particularly regarding the cumulative  
412 effects from multiple pressures, which make validating such assessments challenging.

413 Although the different functional groups of benthic fauna were deemed to experience  
414 differential responses particularly due to indirect impacts from sediment deposition and  
415 suspended sediment, the probability distributions describing these effects are very similar  
416 between infauna and sessile epifauna. While these results may be a consequence of the

417 high uncertainties related to the impacts, further knowledge engineering approaches to  
418 facilitate elicitation (Martin et al. 2012; Laitila and Virtanen 2016) could offer insights into  
419 the effects of multiple pressures. Future development of the model should thus address  
420 improving the quantitative estimates of the risks in terms of both methodology and the  
421 used evidence

## 422 **Expert knowledge in ecological risk assessments**

423 The interviews and the subsequent causal mapping highlighted the challenges in  
424 conceptualizing spatiotemporal complexity related to anthropogenic impacts (Gladstone-  
425 Gallagher et al. 2019). Although we had specifically requested experts to focus on a  
426 discrete spatially defined area and immediate impacts, factors affecting recovery and  
427 spatial extent of impacts arose in all interviews. These differences in temporal scale are a  
428 result of changes in the environment varying in their scope and persistence (see Table S5  
429 for spatial and temporal extent of the pressures), resulting in immediate impacts, chronic  
430 and long-term impacts, and factors affecting the recovery potential of organisms. To  
431 operationalize a multidimensional view of risks and to move towards a quantitative  
432 assessment, it is necessary to consider which pressures operate at which time scales and  
433 spatial dimensions.

434 Given these challenges, attempting direct modelling of such dynamic systems may not be  
435 appropriate, as it can result in excessive simplification and loss of information. Giving the  
436 experts free hands was beneficial for capturing also the non-immediate impacts and in  
437 retrospective, our interviews could have been developed in a more flexible manner. We  
438 argue, however, that providing starting points for the assessment by setting the spatial and  
439 temporal limits helped the experts to get started without being tangled in the  
440 multidimensionality. The results show that it is essential to consider effects from multiple  
441 perspectives and account for the multidimensional disturbance space. An operational



442 assessment should thus include multiple time steps or account for continuous effects and  
443 changes in the prevailing conditions.

#### 444 **How can predictive risk assessment inform marine resource governance?**

445 The paucity of evidence on the impacts of seabed mining calls for more comprehensive  
446 views of the risks and knowledge gaps to support decision-making. Given the modular  
447 structure of BNs, the model presented here may be adapted for more complex ERA  
448 through separate layers and sub-models. While this model provides only a limited view of  
449 the relationships within food webs, functional ecology and biogeochemical connections, it  
450 is a starting point for more detailed ecological risk assessments. Another advantage of  
451 probabilistic approaches is that the conditional probabilities may be drawn from multiple  
452 sources and can include both qualitative and quantitative data. This allows iterative  
453 updating of the model as new information becomes available. BNs can further be  
454 developed into dynamic networks that can also account for temporal changes to measure  
455 resilience and recovery of ecosystems (Wu et al. 2018).

456 To support decision-making on potential future use of seabed resources and further  
457 evaluation of trade-offs from mining, model simulations under alternative mining scenarios  
458 should be compared to existing policy targets regarding acceptable changes in  
459 ecosystems. Using a quantitative approach offers a more robust and transparent means of  
460 estimating the impacts of emerging activities when defining acceptable thresholds to the  
461 impacts (Levin et al. 2016). With recent calls for more empirical approaches to the broad  
462 scale seabed mining initiatives (Drazen et al. 2020 Jul 8), new data on the impacts of  
463 mining may be incorporated in the risk model to learn the probability distributions between  
464 the nodes from data, and further be completed with expert assessment. Estimating the  
465 impacts and accounting for the knowledge gaps with a probabilistic approach can aid to  
466 either support a moratorium and not to go ahead with exploitation in line with a

467 precautionary approach (Barbier et al. 2014), or to provide information for more  
468 comprehensive risk management plans for potential future mining activities, including the  
469 need for mitigation measures. In a case where uncertainties are considered too high,  
470 permits could be made to be conditional on improved knowledge by allowing only one  
471 mining operation to proceed until impacts have been documented in more detail (Smith et al.  
472 2020), urging the industry to carry out further studies.

473 Causal networks may be enhanced into more comprehensive frameworks for integrated  
474 environmental assessments to promote deeper engagement of multiple values and  
475 stakeholders in policy-making (Mourhir et al. 2016). Using a systematic framework with  
476 causal networks helps paint a more complete picture of the system and the associated  
477 environmental impacts, enabling better inclusion of uncertainty in the environmental  
478 management plans of seabed resource use and improving transparency of the estimates.

479 Engaging with multiple experts and sources of knowledge not only strengthens the  
480 knowledge base for assessing the risks, but also allows revealing possibly contradictory  
481 views between experts and stakeholders (Freudenburg et al. 1999).

482 The expanding industrial use of the ocean space and resources calls for more detailed  
483 assessments on the risks associated with them. Recent incentives for more sustainable  
484 marine governance (Lubchenco et al. 2016; Golden et al. 2017; Bennett et al. 2019)  
485 further urge applying an ecosystem approach to resource management, including impact  
486 and risk assessments of activities on both the marine ecosystem and human society.

487 Based on the results of this study, we posit that while empirical observations are key in  
488 unravelling the impacts of novel activities, full consideration of the different scales of risks  
489 requires a systematic approach to bring together findings from empirical studies,  
490 modelling, and expert assessments. An improved view of the risks as an underlying

491 concept in research on the impacts of seabed mining will aid developing integrative  
492 ecosystem based management of emerging maritime industries (Hodgson et al. 2019).

### 493 **ACKNOWLEDGEMENTS**

494 This research was funded by the Strategic Research Council at the Academy of Finland,  
495 under projects SmartSea (grant number 292 985) and WISE (grant number 312627). It  
496 was also funded by the Academy of Finland grant number 311944 to the strategic  
497 research profiling area The Sea at Åbo Akademi University (AT), well as through the  
498 BONUS BLUEWEBS project which has received funding from BONUS (Art 185), funded  
499 jointly by the EU and the Academy of Finland (LU). IH was funded by the Helsinki Institute  
500 of Sustainability Science (HELSUS), University of Helsinki. The authors sincerely thank all  
501 the experts involved in this study for kindly providing their time and expertise.

### 502 **AUTHOR CONTRIBUTIONS**

503 [CRedit taxonomy:](#)

504 Conceptualization: LK; SK, RV; Methodology: LK, LU, IH; Formal analysis and  
505 investigation: LK; Writing - original draft preparation: LK, Writing - review and editing: AT,  
506 HN, LU, IH, KK, RV, SK; Funding acquisition: SK; Supervision: LU, IH, KK, SK, RV

### 507 **SUPPORTING INFORMATION**

508 Supporting information (SI S1-S5) are available as an attachment to this manuscript, as  
509 well as at [https://github.com/lkaikkonen/Causal\\_SBM](https://github.com/lkaikkonen/Causal_SBM) .

### 510 **REFERENCES**

511 Barbier EB, Moreno-Mateos D, Rogers AD, Aronson J, Pendleton L, Danovaro R, Henry L-A,  
512 Morato T, Ardon J, Van Dover CL. 2014. Protect the deep sea. *Nature*. 505:475–477.

- 513 Bennett NJ, Cisneros-Montemayor AM, Blythe J, Silver JJ, Singh G, Andrews N, Calò A, Christie  
514 P, Di Franco A, Finkbeiner EM. 2019. Towards a sustainable and equitable blue economy. *Nat*  
515 *Sustain.*:1–3.
- 516 Borja A, Elliott M, Andersen JH, Berg T, Carstensen J, Halpern BS, Heiskanen A-S, Korpinen S,  
517 Lowndes JSS, Martin G, et al. 2016. Overview of Integrative Assessment of Marine Systems: The  
518 Ecosystem Approach in Practice. *Front Mar Sci.* 3. doi:10.3389/fmars.2016.00020. [accessed 2018  
519 Mar 4]. <https://www.frontiersin.org/articles/10.3389/fmars.2016.00020/full>.
- 520 Boschen RE, Rowden AA, Clark MR, Gardner JPA. 2013. Mining of deep-sea seafloor massive  
521 sulfides: A review of the deposits, their benthic communities, impacts from mining, regulatory  
522 frameworks and management strategies. *Ocean Coast Manag.* 84(Supplement C):54–67.  
523 doi:10.1016/j.ocecoaman.2013.07.005.
- 524 Boyd SE, Limpenny DS, Rees HL, Cooper KM. 2005. The effects of marine sand and gravel  
525 extraction on the macrobenthos at a commercial dredging site (results 6 years post-dredging).  
526 *ICES J Mar Sci.* 62(2):145–162.
- 527 Boyd SE, Rees HL. 2003. An examination of the spatial scale of impact on the marine benthos  
528 arising from marine aggregate extraction in the central English Channel. *Estuar Coast Shelf Sci.*  
529 57(1):1–16.
- 530 Burgman M. 2005. Risks and decisions for conservation and environmental management.  
531 Cambridge University Press.
- 532 Burgman MA. 2016. Trusting judgements: how to get the best out of experts. Cambridge University  
533 Press.
- 534 Carriger JF, Barron MG, Newman MC. 2016. Bayesian Networks Improve Causal Environmental  
535 Assessments for Evidence-Based Policy. *Environ Sci Technol.* 50(24):13195–13205.  
536 doi:10.1021/acs.est.6b03220.
- 537 Carriger JF, Dyson BE, Benson WH. 2018. Representing causal knowledge in environmental  
538 policy interventions: Advantages and opportunities for qualitative influence diagram applications.  
539 *Integr Environ Assess Manag.* 14(3):381–394.
- 540 Chen SH, Pollino CA. 2012. Good practice in Bayesian network modelling. *Environ Model Softw.*  
541 37:134–145. doi:10.1016/j.envsoft.2012.03.012.
- 542 Christiansen B, Denda A, Christiansen S. 2020. Potential effects of deep seabed mining on pelagic  
543 and benthopelagic biota. *Mar Policy.* 114:103442. doi:10.1016/j.marpol.2019.02.014.
- 544 Couvidat J, Chatain V, Bouzahzah H, Benzaazoua M. 2018. Characterization of how contaminants  
545 arise in a dredged marine sediment and analysis of the effect of natural weathering. *Sci Total*  
546 *Environ.* 624:323–332. doi:10.1016/j.scitotenv.2017.12.130.
- 547 Desprez M, Pearce B, Le Bot S. 2009. The biological impact of overflowing sands around a marine  
548 aggregate extraction site: Dieppe (eastern English Channel). *ICES J Mar Sci.* 67(2):270–277.
- 549 Drazen JC, Smith CR, Gjerde KM, Haddock SHD, Carter GS, Choy CA, Clark MR, Dutrieux P,  
550 Goetze E, Hauton C, et al. 2020 Jul 8. Opinion: Midwater ecosystems must be considered when  
551 evaluating environmental risks of deep-sea mining. *Proc Natl Acad Sci.*  
552 doi:10.1073/pnas.2011914117. [accessed 2020 Jul 9].  
553 <https://www.pnas.org/content/early/2020/07/07/2011914117>.

- 554 Fenton N, Neil M. 2012. Risk assessment and decision analysis with Bayesian networks. Crc  
555 Press.
- 556 Freudenburg WR, Silver R, Natter U, Talwalkar C. 1999. Tools for understanding the  
557 socioeconomic and political settings for environmental decision making. In: Tools to aid  
558 environmental decision making. Springer. p. 94–129.
- 559 Gladstone-Gallagher RV, Pilditch CA, Stephenson F, Thrush SF. 2019. Linking Traits across  
560 Ecological Scales Determines Functional Resilience. *Trends Ecol Evol.* 34(12):1080–1091.  
561 doi:10.1016/j.tree.2019.07.010.
- 562 Golden JS, Virdin J, Nowacek D, Halpin P, Bennear L, Patil PG. 2017. Making sure the blue  
563 economy is green. *Nat Ecol Evol.* 1(2):1–3.
- 564 Halpern BS, Frazier M, Potapenko J, Casey KS, Koenig K, Longo C, Lowndes JS, Rockwood RC,  
565 Selig ER, Selkoe KA. 2015. Spatial and temporal changes in cumulative human impacts on the  
566 world's ocean. *Nat Commun.* 6(1):1–7.
- 567 Halpern BS, Fujita R. 2013. Assumptions, challenges, and future directions in cumulative impact  
568 analysis. *Ecosphere.* 4(10):1–11.
- 569 Hassall KL, Dailey G, Zawadzka J, Milne AE, Harris JA, Corstanje R, Whitmore AP. 2019.  
570 Facilitating the elicitation of beliefs for use in Bayesian Belief modelling. *Environ Model Softw.*  
571 122:104539. doi:10.1016/j.envsoft.2019.104539.
- 572 Hauton C, Brown A, Thatje S, Mestre NC, Bebianno MJ, Martins I, Bettencourt R, Canals M,  
573 Sanchez-Vidal A, Shillito B, et al. 2017. Identifying Toxic Impacts of Metals Potentially Released  
574 during Deep-Sea Mining—A Synthesis of the Challenges to Quantifying Risk. *Front Mar Sci.* 4.  
575 doi:10.3389/fmars.2017.00368. [accessed 2017 Nov 16].  
576 <https://www.frontiersin.org/articles/10.3389/fmars.2017.00368/full>.
- 577 Hein JR, Mizell K, Koschinsky A, Conrad TA. 2013. Deep-ocean mineral deposits as a source of  
578 critical metals for high-and green-technology applications: Comparison with land-based resources.  
579 *Ore Geol Rev.* 51:1–14.
- 580 Helle I, Mäkinen J, Nevalainen M, Afenyó M, Vanhatalo J. 2020. Impacts of Oil Spills on Arctic  
581 Marine Ecosystems: A Quantitative and Probabilistic Risk Assessment Perspective. *Environ Sci*  
582 *Technol.* 54(4):2112–2121. doi:10.1021/acs.est.9b07086.
- 583 Hemming V, Burgman MA, Hanea AM, McBride MF, Wintle BC. 2018. A practical guide to  
584 structured expert elicitation using the IDEA protocol. *Methods Ecol Evol.* 9(1):169–180.  
585 doi:10.1111/2041-210X.12857.
- 586 Hewitt JE, Lundquist CJ, Ellis J. 2018. Assessing sensitivities of marine areas to stressors based  
587 on biological traits. *Conserv Biol.*
- 588 Hodgson EE, Essington TE, Samhouri JF, Allison EH, Bennett NJ, Bostrom A, Cullen AC,  
589 Kasperski S, Levin PS, Poe MR. 2019. Integrated Risk Assessment for the Blue Economy. *Front*  
590 *Mar Sci.* 6. doi:10.3389/fmars.2019.00609. [accessed 2020 Jan 28].  
591 <https://www.frontiersin.org/articles/10.3389/fmars.2019.00609/full>.
- 592 Holsman K, Samhouri J, Cook G, Hazen E, Olsen E, Dillard M, Kasperski S, Gaichas S, Kelble  
593 CR, Fogarty M. 2017. An ecosystem-based approach to marine risk assessment. *Ecosyst Health*  
594 *Sustain.* 3(1):e01256.

- 595 Jones DOB, Kaiser S, Sweetman AK, Smith CR, Menot L, Vink A, Trueblood D, Greinert J, Billett  
596 DSM, Arbizu PM, et al. 2017. Biological responses to disturbance from simulated deep-sea  
597 polymetallic nodule mining. Vopel KC, editor. PLOS ONE. 12(2):e0171750.  
598 doi:10.1371/journal.pone.0171750.
- 599 Jones RA, Lee GF. 1981. The significance of dredging and dredged material disposal as a source  
600 of nitrogen and phosphorus for estuarine waters. In: Estuaries and Nutrients. Springer. p. 517–530.
- 601 Kaikkonen L, Parviainen T, Rahikainen M, Uusitalo L, Lehikoinen A. 2021. Bayesian Networks in  
602 Environmental Risk Assessment: A Review. Integr Environ Assess Manag. 17(1):62–78.  
603 doi:<https://doi.org/10.1002/ieam.4332>.
- 604 Kaikkonen L, Venesjärvi R, Nygård H, Kuikka S. 2018. Assessing the impacts of seabed mineral  
605 extraction in the deep sea and coastal marine environments: Current methods and  
606 recommendations for environmental risk assessment. Mar Pollut Bull. 135:1183–1197.  
607 doi:10.1016/j.marpolbul.2018.08.055.
- 608 Kaikkonen L, Virtanen EA, Kostamo K, Lappalainen J, Kotilainen AT. 2019. Extensive coverage of  
609 marine mineral concretions revealed in shallow shelf sea areas. Front Mar Sci. 6:541.
- 610 Koschinsky A, Heinrich L, Boehnke K, Cohrs JC, Markus T, Shani M, Singh P, Stegen KS, Werner  
611 W. 2018. Deep-sea mining: Interdisciplinary research on potential environmental, legal, economic,  
612 and societal implications. Integr Environ Assess Manag. 14(6):672–691. doi:10.1002/ieam.4071.
- 613 Kostamo K (editor). 2021. Sustainable use of sea sand and subsea mineral resources.  
614 Publications of the Ministry of Environment 2021:3, Helsinki, 109 pp. [http://urn.fi/URN:ISBN:978-](http://urn.fi/URN:ISBN:978-952-361-193-1)  
615 [952-361-193-1](http://urn.fi/URN:ISBN:978-952-361-193-1).
- 616 Krause JC, Diesing M, Arlt G. 2010. The physical and biological impact of sand extraction: a case  
617 study of the western Baltic Sea. J Coast Res.:215–226.
- 618 Kulkarni K, Goerlandt F, Li J, Banda OV, Kujala P. 2020. Preventing shipping accidents: Past,  
619 present, and future of waterway risk management with Baltic Sea focus. Saf Sci. 129:104798.
- 620 Laitila P, Virtanen K. 2016. Improving construction of conditional probability tables for ranked  
621 nodes in Bayesian networks. IEEE Trans Knowl Data Eng. 28(7):1691–1705.
- 622 LaMere K, Mäntyniemi S, Vanhatalo J, Haapasaari P. 2020. Making the most of mental models:  
623 Advancing the methodology for mental model elicitation and documentation with expert  
624 stakeholders. Environ Model Softw. 124:104589.
- 625 Levin LA, Mengerink K, Gjerde KM, Rowden AA, Van Dover CL, Clark MR, Ramirez-Llodra E,  
626 Currie B, Smith CR, Sato KN, et al. 2016. Defining “serious harm” to the marine environment in the  
627 context of deep-seabed mining. Mar Policy. 74:245–259. doi:10.1016/j.marpol.2016.09.032.
- 628 Lohrer AM, Wetz JJ. 2003. Dredging-induced nutrient release from sediments to the water column  
629 in a southeastern saltmarsh tidal creek. Mar Pollut Bull. 46(9):1156–1163.
- 630 Lubchenco J, Cerny-Chipman EB, Reimer JN, Levin SA. 2016. The right incentives enable ocean  
631 sustainability successes and provide hope for the future. Proc Natl Acad Sci. 113(51):14507–  
632 14514.
- 633 Martin TG, Burgman MA, Fidler F, Kuhnert PM, Low-Choy S, McBride M, Mengersen K. 2012.  
634 Eliciting expert knowledge in conservation science. Conserv Biol. 26(1):29–38.

- 635 Miljutin DM, Miljutina MA, Arbizu PM, Galéron J. 2011. Deep-sea nematode assemblage has not  
636 recovered 26 years after experimental mining of polymetallic nodules (Clarion-Clipperton Fracture  
637 Zone, Tropical Eastern Pacific). *Deep Sea Res Part Oceanogr Res Pap.* 58(8):885–897.
- 638 Miller KA, Thompson KF, Johnston P, Santillo D. 2018. An Overview of Seabed Mining Including  
639 the Current State of Development, Environmental Impacts, and Knowledge Gaps. *Front Mar Sci.* 4.  
640 doi:10.3389/fmars.2017.00418. [accessed 2018 Jan 11].  
641 <https://www.frontiersin.org/articles/10.3389/fmars.2017.00418/full>.
- 642 Mourhir A, Rachidi T, Papageorgiou EI, Karim M, Alaoui FS. 2016. A cognitive map framework to  
643 support integrated environmental assessment. *Environ Model Softw.* 77:81–94.  
644 doi:10.1016/j.envsoft.2015.11.018.
- 645 Newell RC, Seiderer LJ, Simpson NM, Robinson JE. 2004. Impacts of marine aggregate dredging  
646 on benthic macrofauna off the south coast of the United Kingdom. *J Coast Res.*:115–125.
- 647 O'Hagan A, Buck CE, Daneshkhah A, Eiser JR, Garthwaite PH, Jenkinson DJ, Oakley JE, Rakow  
648 T. 2006. *Uncertain judgements: eliciting experts' probabilities.* John Wiley & Sons.
- 649 Orcutt BN, Bradley JA, Brazelton WJ, Estes ER, Goordial JM, Huber JA, Jones RM, Mahmoudi N,  
650 Marlow JJ, Murdock S. 2018. Impacts of deep-sea mining on microbial ecosystem services. *Limnol*  
651 *Oceanogr.*
- 652 Özesmi U, Özesmi SL. 2004. Ecological models based on people's knowledge: a multi-step fuzzy  
653 cognitive mapping approach. *Ecol Model.* 176(1–2):43–64.
- 654 Pearl J. 1986. Fusion, propagation, and structuring in belief networks. *Artif Intell.* 29(3):241–288.
- 655 Pearl J. 2009. *Causality.* Cambridge university press.
- 656 Perdicoulis A, Glasson J. 2006. Causal networks in EIA. *Environ Impact Assess Rev.* 26(6):553–  
657 569.
- 658 Quemmerais-Amice F, Barrere J, La Rivière M, Contin G, Bailly D. 2020. A Methodology and Tool  
659 for Mapping the Risk of Cumulative Effects on Benthic Habitats. *Front Mar Sci.* 7.  
660 doi:10.3389/fmars.2020.569205. [accessed 2020 Nov 12].  
661 <https://www.frontiersin.org/articles/10.3389/fmars.2020.569205/full>.
- 662 R. 2020. R Core Team (2020). R: A language and environment for statistical computing. R  
663 Foundation for Statistical Computing, Vienna, Austria. URL <https://www.R-project.org/>.
- 664 Renn O. 2008. Concepts of risk: an interdisciplinary review part 1: disciplinary risk concepts. *GAIA-*  
665 *Ecol Perspect Sci Soc.* 17(1):50–66.
- 666 Reusch TB, Dierking J, Andersson HC, Bonsdorff E, Carstensen J, Casini M, Czajkowski M, Hasler  
667 B, Hinsby K, Hyytiäinen K. 2018. The Baltic Sea as a time machine for the future coastal ocean.  
668 *Sci Adv.* 4(5):eaar8195.
- 669 Robinson SP, Theobald PD, Hayman G, Wang L-S, Lepper PA, Humphrey VF, Mumford S. 2011.  
670 Measurement of underwater noise arising from marine aggregate dredging operations.
- 671 Scutari M. 2009. Learning Bayesian networks with the bnlearn R package. *ArXiv Prepr*  
672 *ArXiv09083817.*

- 673 Sharma R, Nath BN, Parthiban G, Sankar SJ. 2001. Sediment redistribution during simulated  
674 benthic disturbance and its implications on deep seabed mining. *Deep Sea Res Part II Top Stud*  
675 *Oceanogr.* 48(16):3363–3380.
- 676 Simon-Lledó E, Bett BJ, Huvenne VAI, Köser K, Schoening T, Greinert J, Jones DOB. 2019.  
677 Biological effects 26 years after simulated deep-sea mining. *Sci Rep.* 9(1):8040.  
678 doi:10.1038/s41598-019-44492-w.
- 679 Simpson SL, Spadaro DA. 2016. Bioavailability and chronic toxicity of metal sulfide minerals to  
680 benthic marine invertebrates: implications for deep sea exploration, mining and tailings disposal.  
681 *Environ Sci Technol.* 50(7):4061–4070.
- 682 Smith CR, Tunnicliffe V, Colaço A, Drazen JC, Gollner S, Levin LA, Mestre NC, Metaxas A,  
683 Molodtsova TN, Morato T. 2020. Deep-sea misconceptions cause underestimation of seabed-  
684 mining impacts. *Trends Ecol Evol.* 35(10):853–857.
- 685 Smith SJ, Friedrichs CT. 2011. Size and settling velocities of cohesive flocs and suspended  
686 sediment aggregates in a trailing suction hopper dredge plume. *Cont Shelf Res.* 31(10,  
687 Supplement):S50–S63. doi:10.1016/j.csr.2010.04.002.
- 688 Spearman J. 2015. A review of the physical impacts of sediment dispersion from aggregate  
689 dredging. *Mar Pollut Bull.* 94(1):260–277. doi:10.1016/j.marpolbul.2015.01.025.
- 690 Stelzenmueller V, Fock HO, Gimpel A, Rambo H, Diekmann R, Probst WN, Callies U, Bockelmann  
691 F, Neumann H, Kroencke I. 2015. Quantitative environmental risk assessments in the context of  
692 marine spatial management: current approaches and some perspectives. *ICES J Mar Sci.*  
693 72(3):1022–1042. doi:10.1093/icesjms/fsu206.
- 694 Suter II GW. 2016. Ecological risk assessment. CRC press.
- 695 Theobald PD, Robinson SP, Lepper PA, Hayman G, Humphrey VF, Wang L-S, Mumford S. 2011.  
696 The measurement of underwater noise radiated by dredging vessels during aggregate extraction  
697 operations.
- 698 Törnroos A, Bonsdorff E. 2012. Developing the multitrait concept for functional diversity: lessons  
699 from a system rich in functions but poor in species. *Ecol Appl.* 22(8):2221–2236. doi:10.1890/11-  
700 2042.1.
- 701 Törnroos A, Pecuchet L, Olsson J, G\laardmark A, Blomqvist M, Lindegren M, Bonsdorff E. 2019.  
702 Four decades of functional community change reveals gradual trends and low interlinkage across  
703 trophic groups in a large marine ecosystem. *Glob Change Biol.* 25(4):1235–1246.
- 704 Tversky A, Kahneman D. 1979. Prospect theory: An analysis of decision under risk. *Econometrica.*  
705 47(2):263–291.
- 706 Uusitalo L. 2007. Advantages and challenges of Bayesian networks in environmental modelling.  
707 *Ecol Model.* 203(3):312–318. doi:10.1016/j.ecolmodel.2006.11.033.
- 708 Varis O, Kettunen J, Sirviö H. 1990. Bayesian influence diagram approach to complex  
709 environmental management including observational design. *Comput Stat Data Anal.* 9(1):77–91.
- 710 Vidal O, Rostom F, François C, Giraud G. 2017. Global Trends in Metal Consumption and Supply:  
711 The Raw Material–Energy Nexus. *Elements.* 13(5):319–324. doi:10.2138/gselements.13.5.319.



- 712 Villnäs A, Hewitt J, Snickars M, Westerborn M, Norkko A. 2018. Template for using biological trait  
713 groupings when exploring large-scale variation in seafloor multifunctionality. *Ecol Appl.* 28(1):78–  
714 94. doi:10.1002/eap.1630.
- 715 Voyer M, Quirk G, McIlgorm A, Azmi K. 2018. Shades of blue: what do competing interpretations of  
716 the Blue Economy mean for oceans governance? *J Environ Policy Plan.* 20(5):595–616.
- 717 Washburn TW, Turner PJ, Durden JM, Jones DOB, Weaver P, Van Dover CL. 2019. Ecological  
718 risk assessment for deep-sea mining. *Ocean Coast Manag.* 176:24–39.  
719 doi:10.1016/j.ocecoaman.2019.04.014.
- 720 Winther J-G, Dai M, Rist T, Hoel AH, Li Y, Trice A, Morrissey K, Juinio-Meñez MA, Fernandes L,  
721 Unger S, et al. 2020. Integrated ocean management for a sustainable ocean economy. *Nat Ecol*  
722 *Evol.* 4(11):1451–1458. doi:10.1038/s41559-020-1259-6.
- 723 Wu PP-Y, McMahon K, Rasheed MA, Kendrick GA, York PH, Chartrand K, Caley MJ, Mengersen  
724 K. 2018. Managing seagrass resilience under cumulative dredging affecting light: Predicting risk  
725 using dynamic Bayesian networks. *J Appl Ecol.* 55(3):1339–1350. doi:10.1111/1365-2664.13037.
- 726 Yletyinen J, Bodin Ö, Weigel B, Nordström MC, Bonsdorff E, Blenckner T. 2016. Regime shifts in  
727 marine communities: a complex systems perspective on food web dynamics. *Proc R Soc B Biol*  
728 *Sci.* 283(1825):20152569.
- 729 Zhamoida V, Grigoriev A, Ryabchuk D, Evdokimenko A, Kotilainen AT, Vallius H, Kaskela AM.  
730 2017. Ferromanganese concretions of the eastern Gulf of Finland—Environmental role and effects  
731 of submarine mining. *J Mar Syst.* 172:178–187.

732
